# Supplementary material for: Quantifying the binding strength of U(vi) with phthalimidedioxime in comparison with glutarimidedioxime
Source: Royal Society of Chemistry journal article supplement (doi:10.1039/c3dt52206g), 2013-09-23
Supplement: c3dt52206g.pdf [file c3dt52206g.pdf]

## Supplemental Information

### **Quantifying the binding strength of U(VI) with phthalimidedioxime in comparison with glutarimidedioxime: Implications in the extraction of U(VI) from seawater with amidoxime-based sorbents**

Xiaoqi Sun, Guoxin Tian, Chao Xu, and Linfeng Rao\*  
Chemical Sciences Division, Lawrence Berkeley National Laboratory, Berkeley,  
California 94720, USA

Sinisa Vukovic,\* Sung Ok Kang, and Benjamin P. Hay  
Chemical Sciences Division, Oak Ridge National Laboratory, Oak Ridge, Tennessee  
37831, USA

#### CONTENTS

|                                                                                        |   |
|----------------------------------------------------------------------------------------|---|
| Computation software reference                                                         | 2 |
| Coordinates of <sup>III</sup> L as H <sub>3</sub> L <sup>+</sup> protonated on oxime N | 3 |
| Coordinates of <sup>III</sup> L as H <sub>3</sub> L <sup>+</sup> protonated on oxime O | 4 |
| Coordinates of <sup>III</sup> L as H <sub>3</sub> L <sup>+</sup> protonated on imide N | 5 |
| Coordinates of <sup>III</sup> L as H <sub>3</sub> L <sup>+</sup> protonated on amine N | 6 |
| Calculated energies of U(VI) complexes with <sup>I</sup> L and <sup>II</sup> L         | 7 |

Computational software used:

Gaussian 09, Revision B.01, M. J. Frisch, G. W. Trucks, H. B. Schlegel, G. E. Scuseria, M. A. Robb, J. R. Cheeseman, G. Scalmani, V. Barone, B. Mennucci, G. A. Petersson, H. Nakatsuji, M. Caricato, X. Li, H. P. Hratchian, A. F. Izmaylov, J. Bloino, G. Zheng, J. L. Sonnenberg, M. Hada, M. Ehara, K. Toyota, R. Fukuda, J. Hasegawa, M. Ishida, T. Nakajima, Y. Honda, O. Kitao, H. Nakai, T. Vreven, J. A. Montgomery, Jr., J. E. Peralta, F. Ogliaro, M. Bearpark, J. J. Heyd, E. Brothers, K. N. Kudin, V. N. Staroverov, T. Keith, R. Kobayashi, J. Normand, K. Raghavachari, A. Rendell, J. C. Burant, S. S. Iyengar, J. Tomasi, M. Cossi, N. Rega, J. M. Millam, M. Klene, J. E. Knox, J. B. Cross, V. Bakken, C. Adamo, J. Jaramillo, R. Gomperts, R. E. Stratmann, O. Yazyev, A. J. Austin, R. Cammi, C. Pomelli, J. W. Ochterski, R. L. Martin, K. Morokuma, V. G. Zakrzewski, G. A. Voth, P. Salvador, J. J. Dannenberg, S. Dapprich, A. D. Daniels, O. Farkas, J. B. Foresman, J. V. Ortiz, J. Cioslowski, and D. J. Fox, Gaussian, Inc., Wallingford CT, 2010.

<sup>III</sup>L protonated (H<sub>3</sub>L<sup>+</sup>) at oxime N atom

Energy -718.71936 Hartree

ZPVE 0.20606 Hartree

|   |         |         |         |
|---|---------|---------|---------|
| N | -0.4019 | 2.0936  | 0.0367  |
| C | -1.1422 | 0.9782  | 0.0305  |
| C | 0.9798  | 1.7594  | 0.0072  |
| N | 1.9483  | 2.6009  | -0.0125 |
| N | -2.4765 | 0.9936  | 0.0895  |
| O | -3.0975 | 2.2170  | -0.1468 |
| H | -3.6255 | 2.4052  | 0.6543  |
| O | 1.4816  | 3.9032  | 0.0064  |
| H | 2.2877  | 4.4479  | -0.0184 |
| H | -0.7632 | 3.0393  | -0.0136 |
| H | -3.0094 | 0.1955  | -0.2459 |
| C | -0.2749 | -0.1900 | 0.0120  |
| C | 1.8395  | -1.9507 | -0.0252 |
| C | -0.5745 | -1.5532 | 0.0126  |
| C | 1.0447  | 0.3059  | -0.0032 |
| C | 2.1161  | -0.5935 | -0.0209 |
| C | 0.5069  | -2.4663 | -0.0082 |
| H | -1.5964 | -1.9149 | 0.0368  |
| H | 3.1420  | -0.2399 | -0.0320 |
| H | 2.6658  | -2.6572 | -0.0407 |
| N | 0.3089  | -3.8135 | -0.0107 |
| H | 1.1276  | -4.4046 | -0.0223 |
| C | -0.9914 | -4.4617 | 0.0066  |
| H | -1.5579 | -4.2041 | 0.9115  |
| H | -0.8401 | -5.5424 | -0.0019 |
| H | -1.5857 | -4.1942 | -0.8773 |

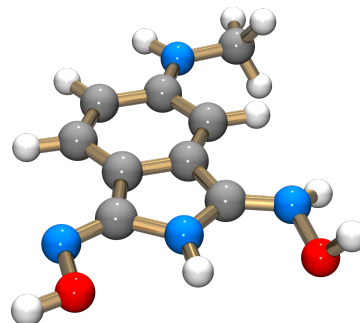

<sup>III</sup>L protonated (H<sub>3</sub>L<sup>+</sup>) at oxime O atom

Energy -718.66291 Hartree

ZPVE 0.020405 Hartree

|   |         |         |         |
|---|---------|---------|---------|
| N | -0.3662 | 2.0852  | -0.0003 |
| C | -1.1439 | 0.9800  | 0.0001  |
| C | 1.0107  | 1.7296  | 0.0000  |
| N | 1.9863  | 2.5612  | 0.0001  |
| N | -2.4495 | 0.8357  | 0.0005  |
| O | -3.0531 | 2.3453  | 0.0000  |
| O | 1.5130  | 3.8751  | -0.0006 |
| H | 2.3220  | 4.4141  | 0.0000  |
| H | -0.6815 | 3.0459  | -0.0003 |
| H | -3.6386 | 2.3485  | -0.7894 |
| H | -3.6380 | 2.3492  | 0.7899  |
| C | -0.2663 | -0.2086 | 0.0004  |
| C | 1.8262  | -1.9917 | 0.0005  |
| C | 1.0547  | 0.2762  | 0.0005  |
| C | -0.5837 | -1.5629 | 0.0002  |
| C | 0.4884  | -2.4886 | 0.0003  |
| C | 2.1154  | -0.6370 | 0.0004  |
| H | -1.6134 | -1.8989 | 0.0002  |
| H | 3.1446  | -0.2923 | 0.0004  |
| H | 2.6450  | -2.7069 | 0.0005  |
| N | 0.2699  | -3.8342 | -0.0002 |
| H | 1.0796  | -4.4374 | 0.0003  |
| C | -1.0403 | -4.4616 | -0.0016 |
| H | -1.6178 | -4.1905 | 0.8921  |
| H | -0.9055 | -5.5447 | -0.0031 |
| H | -1.6170 | -4.1879 | -0.8950 |

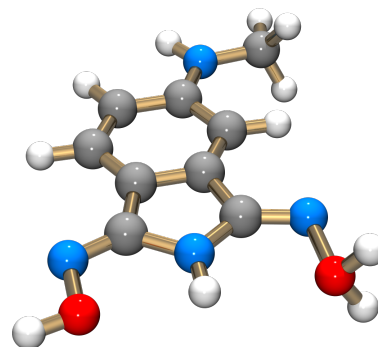

<sup>III</sup>L protonated (H<sub>3</sub>L<sup>+</sup>) at imide N atom

Energy -718.69228 Hartree

ZPVE 0.20667 Hartree

|   |         |         |         |
|---|---------|---------|---------|
| N | 0.4473  | 2.1647  | -0.0001 |
| C | -0.9989 | 1.7267  | 0.0000  |
| C | 1.2494  | 0.8951  | -0.0001 |
| N | 2.5231  | 0.9136  | 0.0000  |
| N | -1.9409 | 2.5893  | 0.0002  |
| O | -1.4242 | 3.8860  | 0.0004  |
| H | -2.2119 | 4.4580  | 0.0008  |
| O | 3.0065  | 2.2138  | 0.0002  |
| H | 3.9755  | 2.1146  | 0.0005  |
| H | 0.6632  | 2.7562  | 0.8166  |
| H | 0.6631  | 2.7563  | -0.8167 |
| C | -1.0056 | 0.2884  | -0.0003 |
| C | -0.4941 | -2.4834 | 0.0000  |
| C | -2.0886 | -0.6084 | -0.0004 |
| C | 0.3133  | -0.2161 | -0.0002 |
| C | 0.5945  | -1.5754 | -0.0001 |
| C | -1.8281 | -1.9636 | -0.0004 |
| H | -3.1104 | -0.2430 | -0.0006 |
| H | 1.6200  | -1.9241 | -0.0002 |
| H | -2.6593 | -2.6642 | -0.0006 |
| N | -0.3015 | -3.8261 | 0.0006  |
| H | -1.1227 | -4.4148 | -0.0002 |
| C | 0.9977  | -4.4829 | 0.0009  |
| H | 1.5771  | -4.2220 | -0.8934 |
| H | 0.8383  | -5.5623 | 0.0027  |
| H | 1.5778  | -4.2192 | 0.8940  |

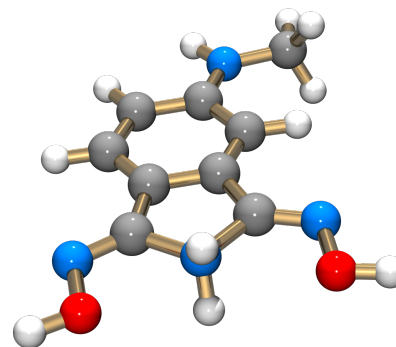

<sup>III</sup>L protonated (H<sub>3</sub>L<sup>+</sup>) at amine N atom

Energy -718.70515 Hartree  
ZPVE 0.20795 Hartree

|   |         |         |         |
|---|---------|---------|---------|
| H | 2.9719  | 0.4131  | 0.1469  |
| C | 1.9238  | 0.6928  | 0.1653  |
| C | -0.8397 | 1.4098  | 0.2298  |
| C | 0.9212  | -0.2739 | 0.0884  |
| C | 1.5421  | 2.0316  | 0.2733  |
| C | 0.1798  | 2.3548  | 0.3026  |
| C | -0.4415 | 0.0797  | 0.1216  |
| H | 2.3021  | 2.8072  | 0.3377  |
| H | -1.8942 | 1.6742  | 0.2583  |
| C | 0.9931  | -1.7355 | -0.0248 |
| C | -1.2304 | -1.1541 | 0.0314  |
| N | 2.0867  | -2.4114 | -0.0810 |
| N | -2.5171 | -1.1976 | 0.0367  |
| O | -2.9456 | -2.5249 | -0.0634 |
| H | -3.9149 | -2.4612 | -0.0471 |
| O | 1.7977  | -3.7733 | -0.1857 |
| H | 2.6718  | -4.1966 | -0.2192 |
| N | -0.3189 | -2.1975 | -0.0563 |
| H | -0.5762 | -3.1729 | -0.1267 |
| N | -0.1992 | 3.7929  | 0.3861  |
| C | -0.3447 | 4.4951  | -0.9505 |
| H | 0.6104  | 4.4286  | -1.4714 |
| H | -0.6193 | 5.5365  | -0.7696 |
| H | -1.1200 | 3.9805  | -1.5182 |
| H | -1.0821 | 3.8764  | 0.9042  |
| H | 0.4978  | 4.2925  | 0.9513  |

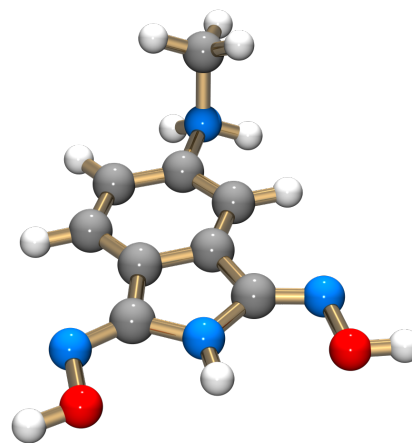

Calculated energies of U(VI) complexes with  $^{\text{I}}\text{L}$  and  $^{\text{II}}\text{L}$  (B3LYP/6-31+G\* and IEFPCM)

| Reaction (L = $^{\text{I}}\text{L}$ or $^{\text{II}}\text{L}$ )                                                                                                         | $\Delta G_{(\text{aq})}$ [kcal/mol] |                        |
|-------------------------------------------------------------------------------------------------------------------------------------------------------------------------|-------------------------------------|------------------------|
|                                                                                                                                                                         | $^{\text{I}}\text{L}$               | $^{\text{II}}\text{L}$ |
| $\text{HL}^- + \text{UO}_2^{2+} = \text{UO}_2(\text{HL})^+$                                                                                                             | -30.81                              | -15.31                 |
| $\text{HL}^- + \text{UO}_2^{2+} + 2\text{H}_2\text{O} = \text{UO}_2(\text{HL})(\text{H}_2\text{O})_2^+$                                                                 | -28.43                              | -13.23                 |
| $\text{HL}^- + \text{UO}_2(\text{H}_2\text{O})_5^{2+} = \text{UO}_2(\text{HL})(\text{H}_2\text{O})_2^+ + 3\text{H}_2\text{O}$                                           | -41.96                              | -26.76                 |
| $\text{H}_2\text{L} + \text{UO}_2(\text{H}_2\text{O})_2^{2+} = \text{UO}_2(\text{HL})(\text{H}_2\text{O})_2^+ + \text{H}^+$                                             | -3.41                               | 10.39                  |
| $\text{H}_2\text{L}(\text{H}_2\text{O})_2 + \text{UO}_2(\text{H}_2\text{O})_5^{2+} = \text{UO}_2(\text{HL})(\text{H}_2\text{O})_2^+ + 5\text{H}_2\text{O} + \text{H}^+$ | -13.28                              | 0.26                   |
